# Supplementary material
Source: MDPI journal article supplement (https://www.mdpi.com/2073-4441/14/2/253)
Supplement: s1 [file s1]

**Table S1** Drought indices in terms of ease of use, number of publications, most used countries and time span

| Category       | Abb.    | Ease of use | Number of publications | Most Cited Countries (Top 3)     | Number of countries used | Time Span |
|----------------|---------|-------------|------------------------|----------------------------------|--------------------------|-----------|
| Meteorological | AAI     | 1           | 7                      | Netherlands; India; Korea        | 4                        | 2009:2018 |
| Meteorological | deciles | 1           | 69                     | Australia; Greece; USA           | 17                       | 1992:2021 |
| Meteorological | KBDI    | 1           | 86                     | USA; Australia; Italy            | 20                       | 1988:2021 |
| Meteorological | PNPI    | 1           | 22                     | India; USA; Serbia               | 9                        | 2009:2021 |
| Meteorological | SPI     | 1           | 2483                   | USA; China; Spain                | 85                       | 1998:2021 |
| Meteorological | WASP    | 1           | 48                     | USA; Japan; Australia            | 17                       | 1977:2021 |
| Meteorological | AI      | 2           | 241                    | China; Iran; Germany             | 43                       | 1965:2021 |
| Meteorological | CZI     | 2           | 34                     | Iran; USA; Turkey                | 10                       | 2001:2021 |
| Meteorological | CMI     | 2           | 40                     | Spain; Canada; USA               | 12                       | 1976:2021 |
| Meteorological | DAI     | 2           | 44                     | USA; China; Norway               | 15                       | 1979:2021 |
| Meteorological | DRI     | 2           | 260                    | Greece; Spain; Iran              | 32                       | 1999:2021 |
| Meteorological | EDI     | 2           | 100                    | Iran; Korea; Australia           | 19                       | 1999:2021 |
| Meteorological | HTC     | 2           | 21                     | Germany; Australia; South Africa | 9                        | 1982:2021 |
| Meteorological | NDI     | 2           | 11                     | USA; Mexico; Malaysia            | 8                        | 1993:2020 |
| Meteorological | PDSI    | 2           | 1245                   | USA; China; Norway               | 57                       | 1977:2021 |
| Meteorological | PZI     | 2           | 48                     | USA; Czech Republic; Italy       | 11                       | 1986:2021 |
| Meteorological | RAI     | 2           | 314                    | Japan; USA; Brazil               | 39                       | 1981:2021 |
| Meteorological | sc-PDSI | 2           | 120                    | Spain; USA; China                | 24                       | 2004:2021 |
| Meteorological | SAI     | 2           | 29                     | Spain; China; Bahrain            | 13                       | 1986:2021 |
| Meteorological | SPEI    | 2           | 1207                   | Spain; China; USA                | 68                       | 2010:2021 |
| Meteorological | ARID    | 3           | 11                     | USA; Brazil                      | 2                        | 2012:2020 |
| Meteorological | CSDI    | 3           | 9                      | USA; Iran; India                 | 3                        | 1984:2017 |
| Soil Moisture  | SMA     | 2           | 140                    | USA; Switzerland; United Kingdom | 28                       | 1991:2021 |

|                          |         |   |      |                               |    |           |
|--------------------------|---------|---|------|-------------------------------|----|-----------|
| Soil Moisture            | ETDI    | 3 | 18   | USA; Netherlands; China       | 7  | 2005:2021 |
| Soil Moisture            | SMDI    | 3 | 18   | USA; Netherlands; China       | 8  | 2005:2021 |
| Soil Moisture            | SWS     | 3 | 680  | USA; China; Spain             | 62 | 1963:2021 |
| Hydrological             | PHDI    | 2 | 43   | USA; Greece; Spain            | 10 | 1989:2020 |
| Hydrological             | SRSI    | 2 | 4    | China                         | 1  | 2015:2015 |
| Hydrological             | SSFI    | 2 | 89   | China; Spain; Iran            | 20 | 2007:2021 |
| Hydrological             | SWI     | 2 | 57   | India; China; USA             | 17 | 2004:2021 |
| Hydrological             | SDI     | 2 | 185  | Greece; China; Spain          | 39 | 1990:2021 |
| Hydrological             | SWSI    | 2 | 21   | USA; Australia; Iran          | 7  | 1982:2020 |
| Hydrological             | ADI     | 3 | 25   | USA; China; Australia         | 9  | 1996:2021 |
| Hydrological             | SMRI    | 3 | 2    | South Africa                  | 1  | 2014:2017 |
| Remote sensing           | EVI     | 1 | 293  | USA; China; Brazil            | 36 | 2004:2021 |
| Remote sensing           | ESI     | 1 | 96   | USA; China; Korea             | 26 | 2002:2021 |
| Remote sensing           | NDVI    | 1 | 2023 | USA; China; Spain             | 76 | 1986:2021 |
| Remote sensing           | TCI     | 1 | 171  | USA; China; India             | 30 | 1995:2021 |
| Remote sensing           | VCI     | 1 | 283  | USA; India; China             | 39 | 1990:2021 |
| Remote sensing           | VegDRI  | 1 | 16   | USA; China; Korea             | 3  | 2008:2021 |
| Remote sensing           | VHI     | 1 | 152  | USA; China; India             | 29 | 2001:2021 |
| Remote sensing           | WRSI    | 1 | 19   | USA; South Africa;<br>Brazil  | 5  | 2002:2020 |
| Remote sensing           | NDWI    | 1 | 181  | USA; China;<br>United Kingdom | 34 | 2004:2021 |
| Remote sensing           | LSWI    | 1 | 24   | USA; India; Japan             | 6  | 2009:2021 |
| Remote sensing           | SAVI    | 3 | 63   | USA; China; Japan             | 18 | 1994:2021 |
| Composite or<br>modelled | CDI     | 1 | 40   | China; Korea; India           | 18 | 2005:2021 |
| Composite or<br>modelled | GIDMaPS | 1 | 2    | USA                           | 2  | 2014:2019 |
| Composite or<br>modelled | GLDAS   | 1 | 109  | USA; China; Germany           | 21 | 2008:2021 |

|                       |      |   |    |                       |    |           |
|-----------------------|------|---|----|-----------------------|----|-----------|
| Composite or modelled | MSDI | 1 | 39 | USA; China; Australia | 10 | 2013:2021 |
| Composite or modelled | USDM | 1 | 49 | USA; Korea; China     | 5  | 2010:2021 |

Abb. is abbreviation

**Table S2** Themes and keywords in thematic map

| <b>Cluster Representation</b> | <b>Theme</b>   | <b>Keywords in Clusters</b>                                                                                |
|-------------------------------|----------------|------------------------------------------------------------------------------------------------------------|
| Drought prediction            | Motor Theme    | Drought prediction, standardized precipitation index, drought indices, copula, hydrological drought        |
| Drought risk                  | Basic Theme    | Drought risk, risk assessment, vulnerability, agricultural drought, drought index                          |
| Remote sensing                | Emerging Theme | Remote sensing, GIS, MODIS, Bangladesh, monitoring                                                         |
| Drought                       | Basic Theme    | Drought, climate change, risk, precipitation, soil moisture, adaptation, agriculture, ENSO                 |
| Risk management               | Motor Theme    | Risk management, droughts, climate variability, drought, management, drought risk, management, uncertainty |
| Cloud computing               | Niche Theme    | Cloud computing, fog computing                                                                             |
| Markov chain                  | Niche Theme    | Markov chain                                                                                               |
| SPI                           | Basic Theme    | SPI, drought forecasting, forecasting, machine learning                                                    |
| Prediction                    | Emerging Theme | SPEI, artificial neural network<br>Prediction, modelling, hydrology, land surface model, classification    |
| Drought stress                | Niche Theme    | Drought stress, drought tolerance, risk analysis, water deficit, wheat                                     |
